# Supplementary material for: Promoter activity dynamics in the lag phase of Escherichia coli
Source: PubMed Central journal article supplement (PMC3918108; doi:10.1186/1752-0509-7-136), 2013-12-30

### Lag phase GFP reporters mean fluorescence

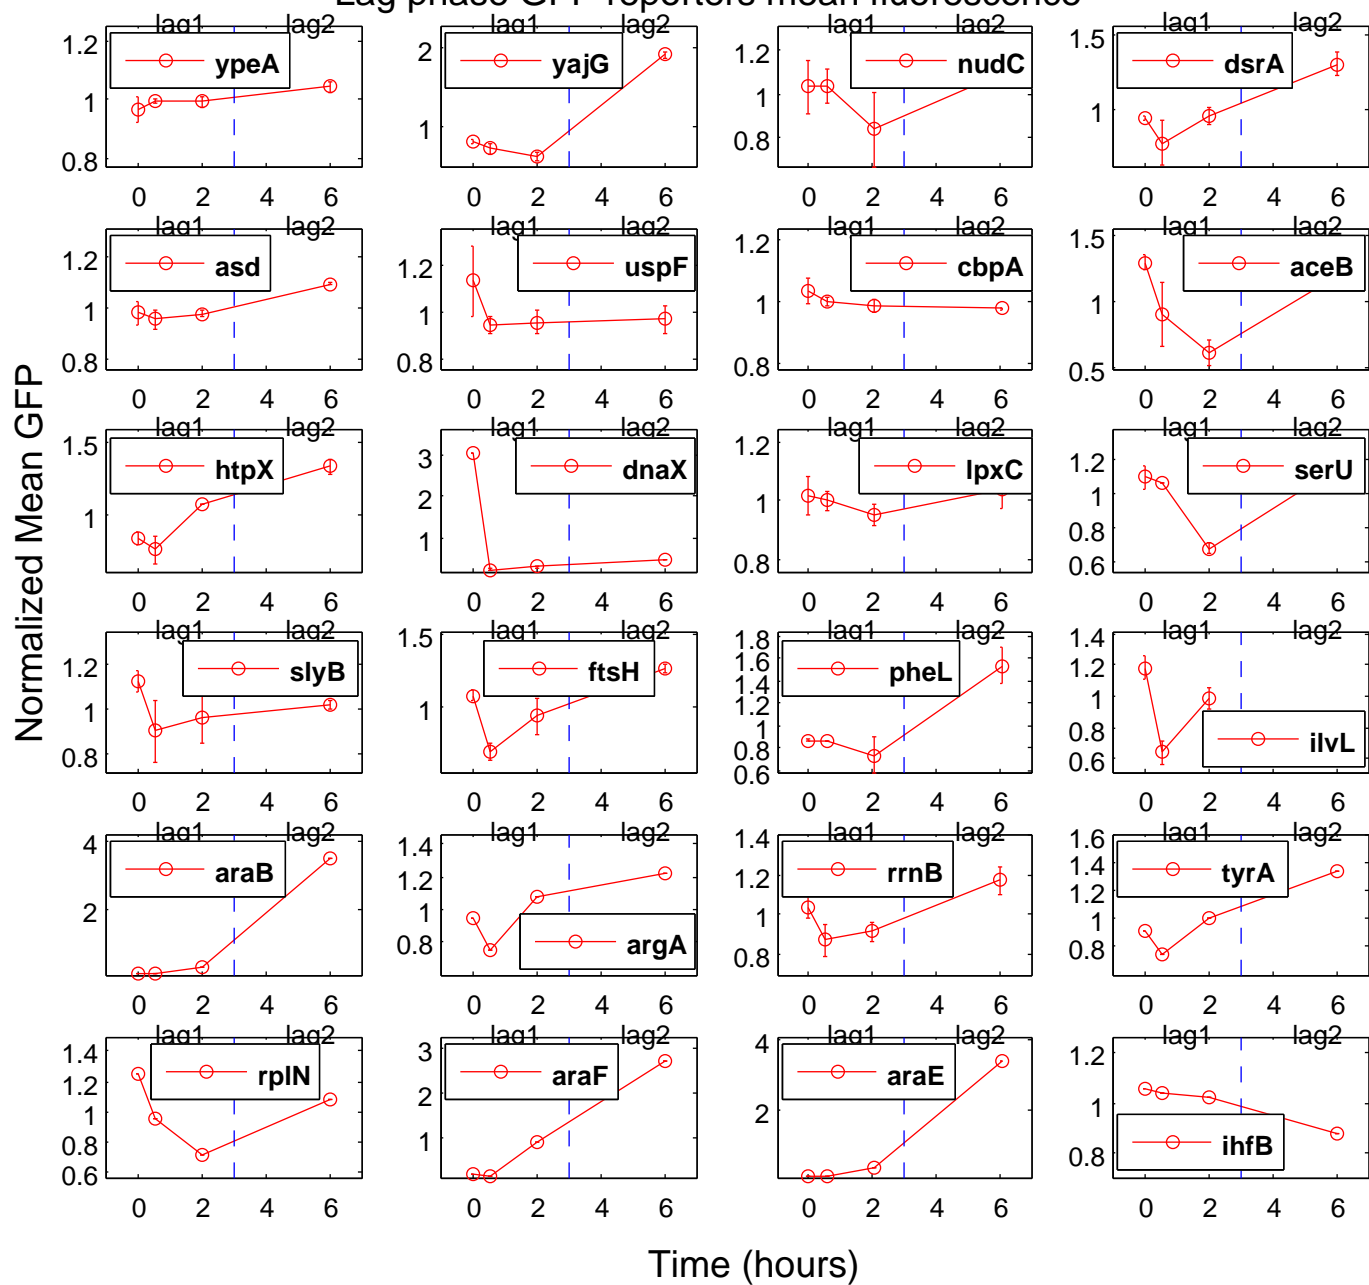

### Lag phase GFP reporters mean fluorescence

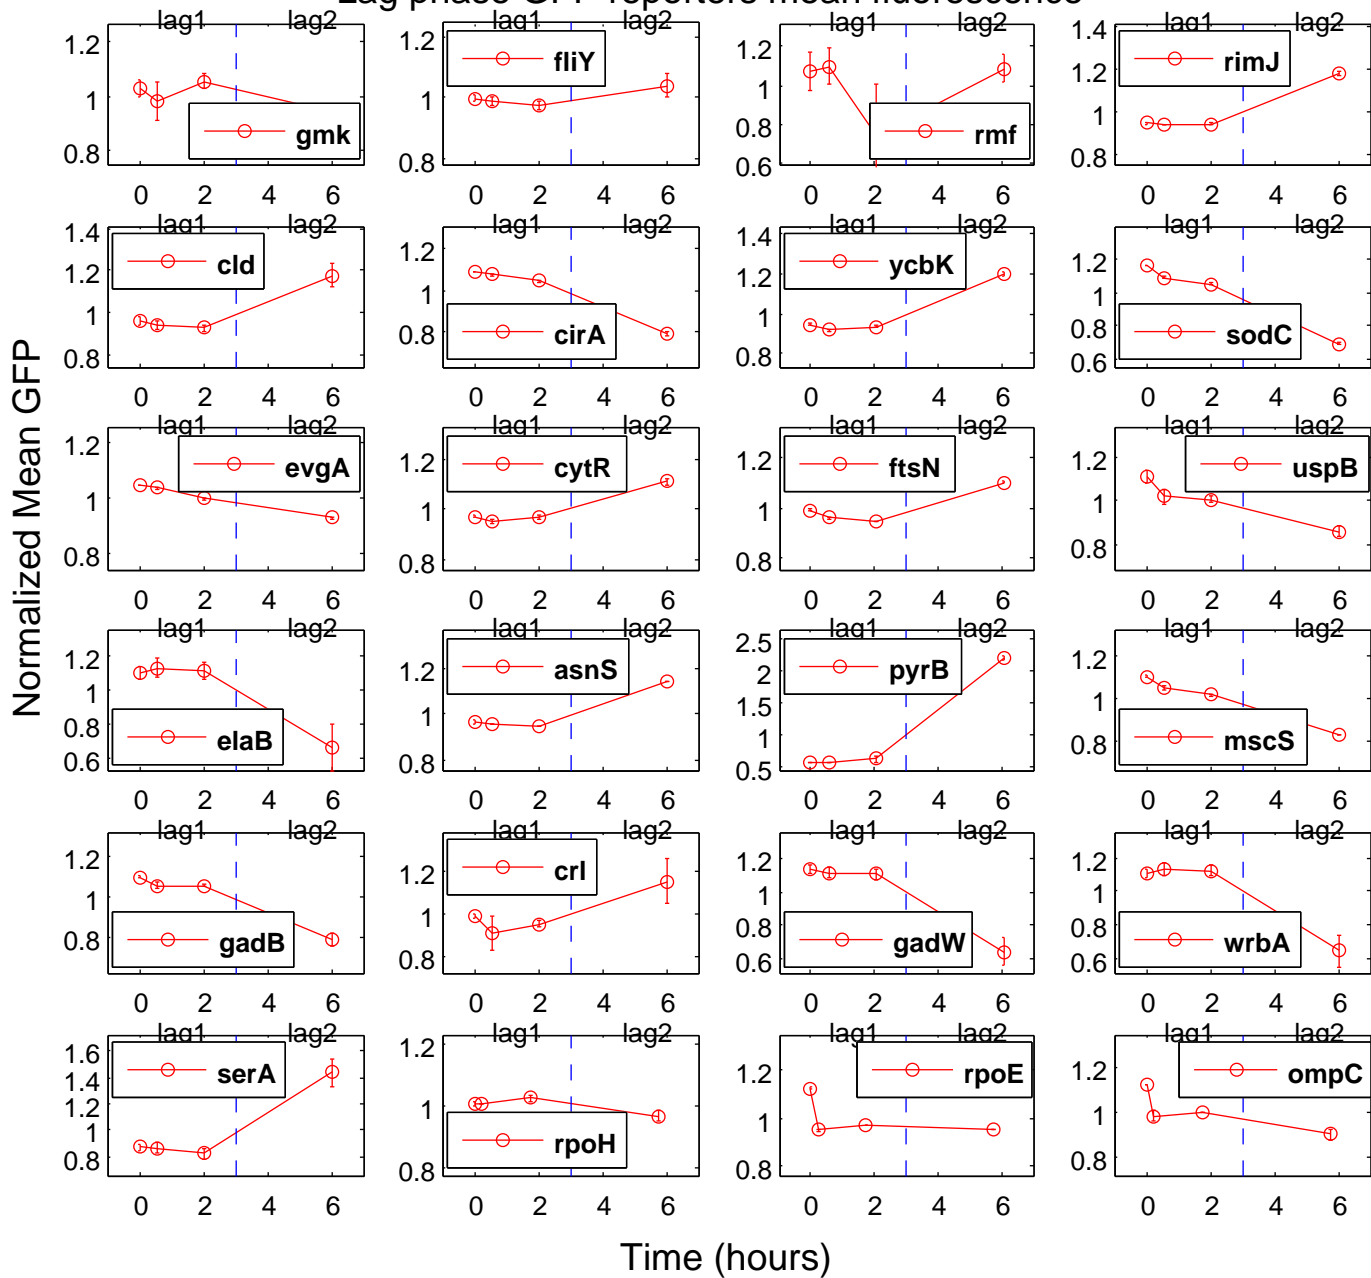

### Lag phase GFP reporters mean fluorescence

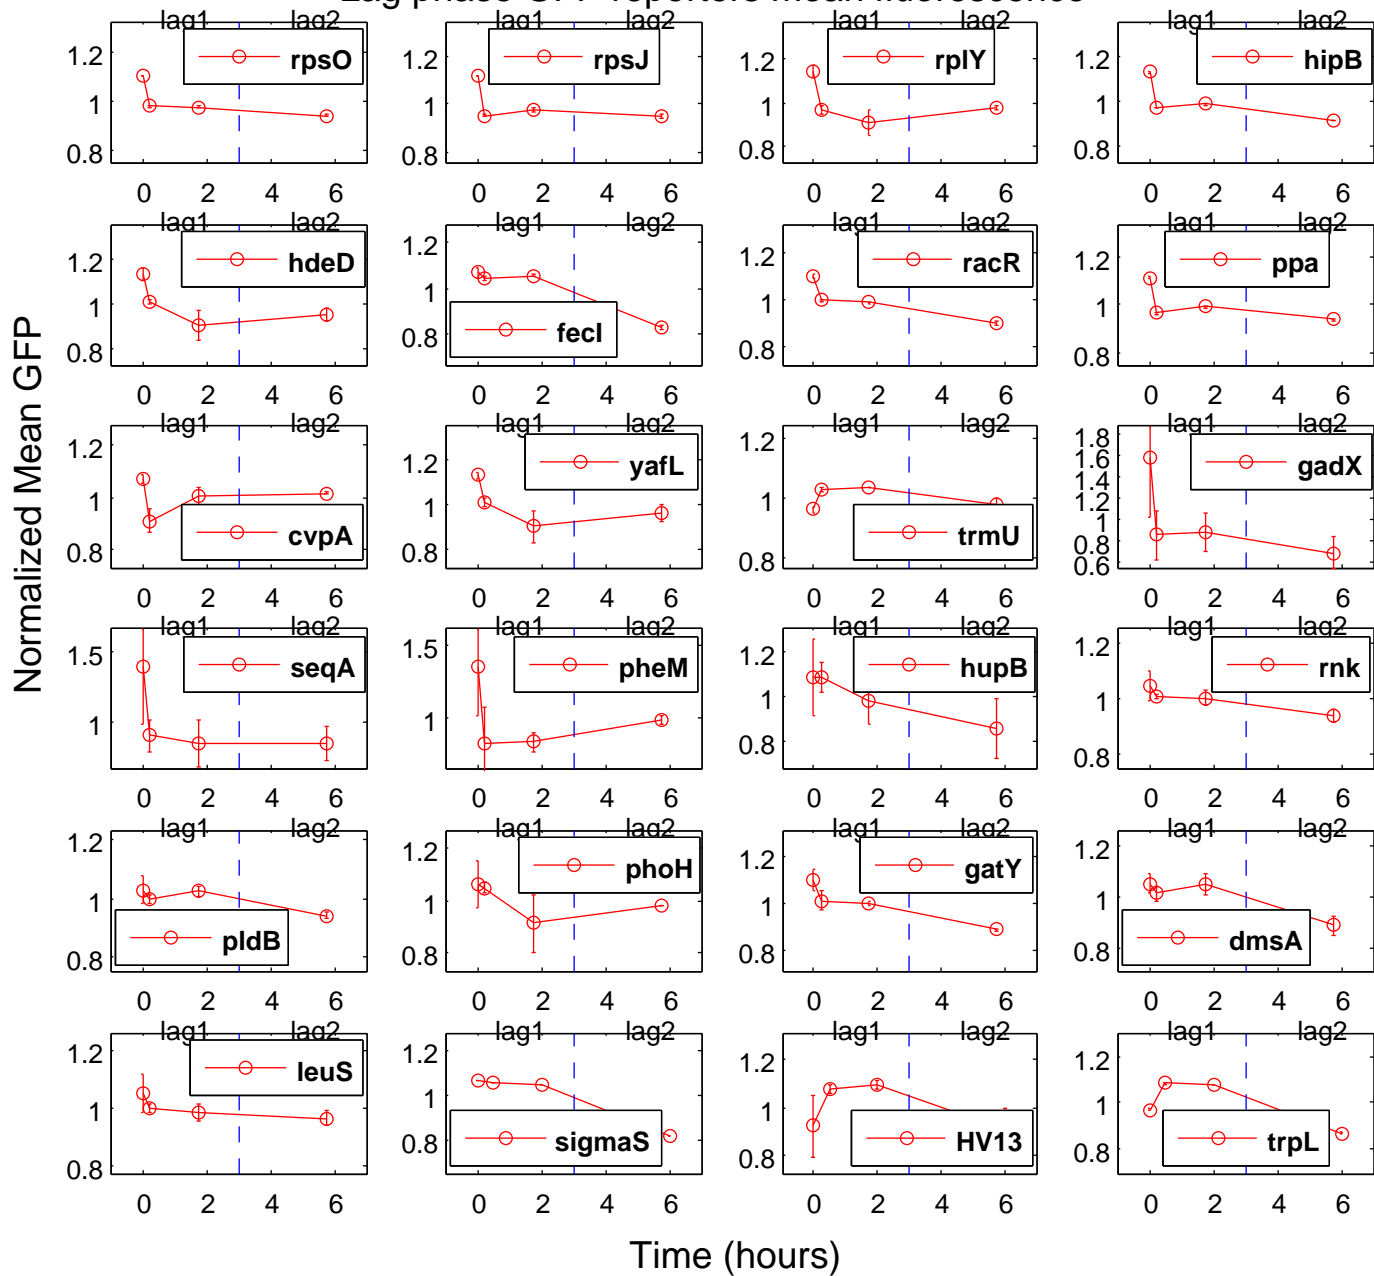

### Lag phase GFP reporters mean fluorescence

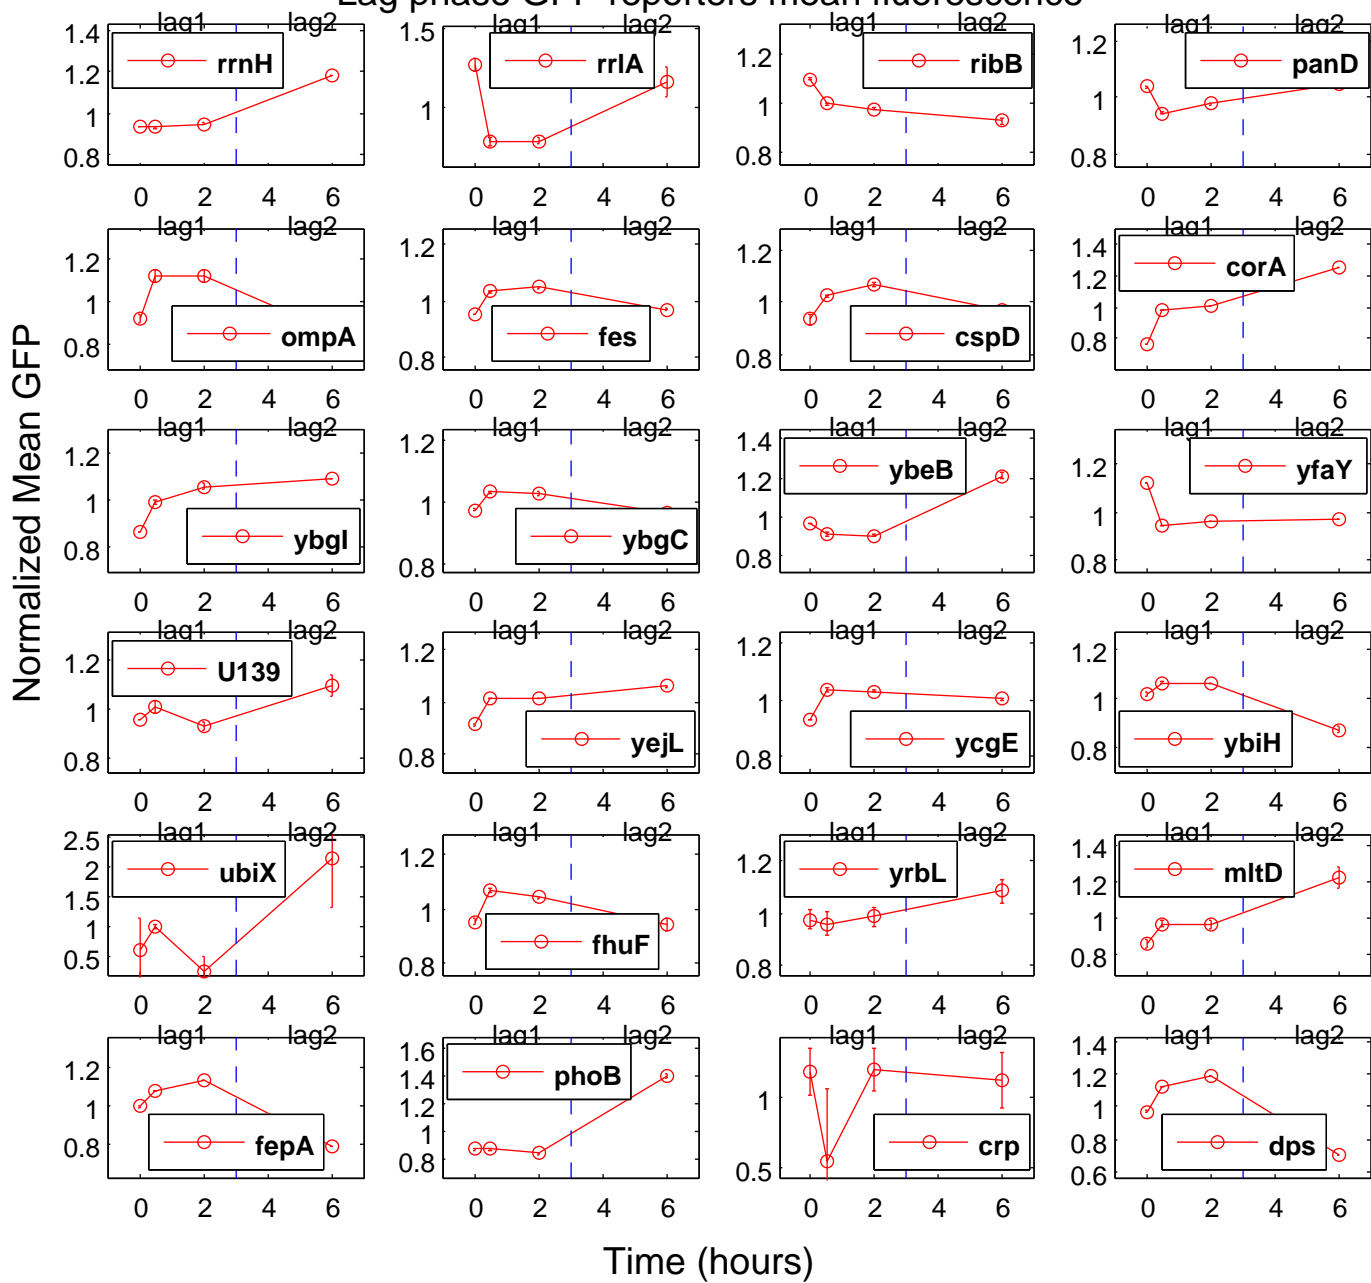

### Lag phase GFP reporters mean fluorescence

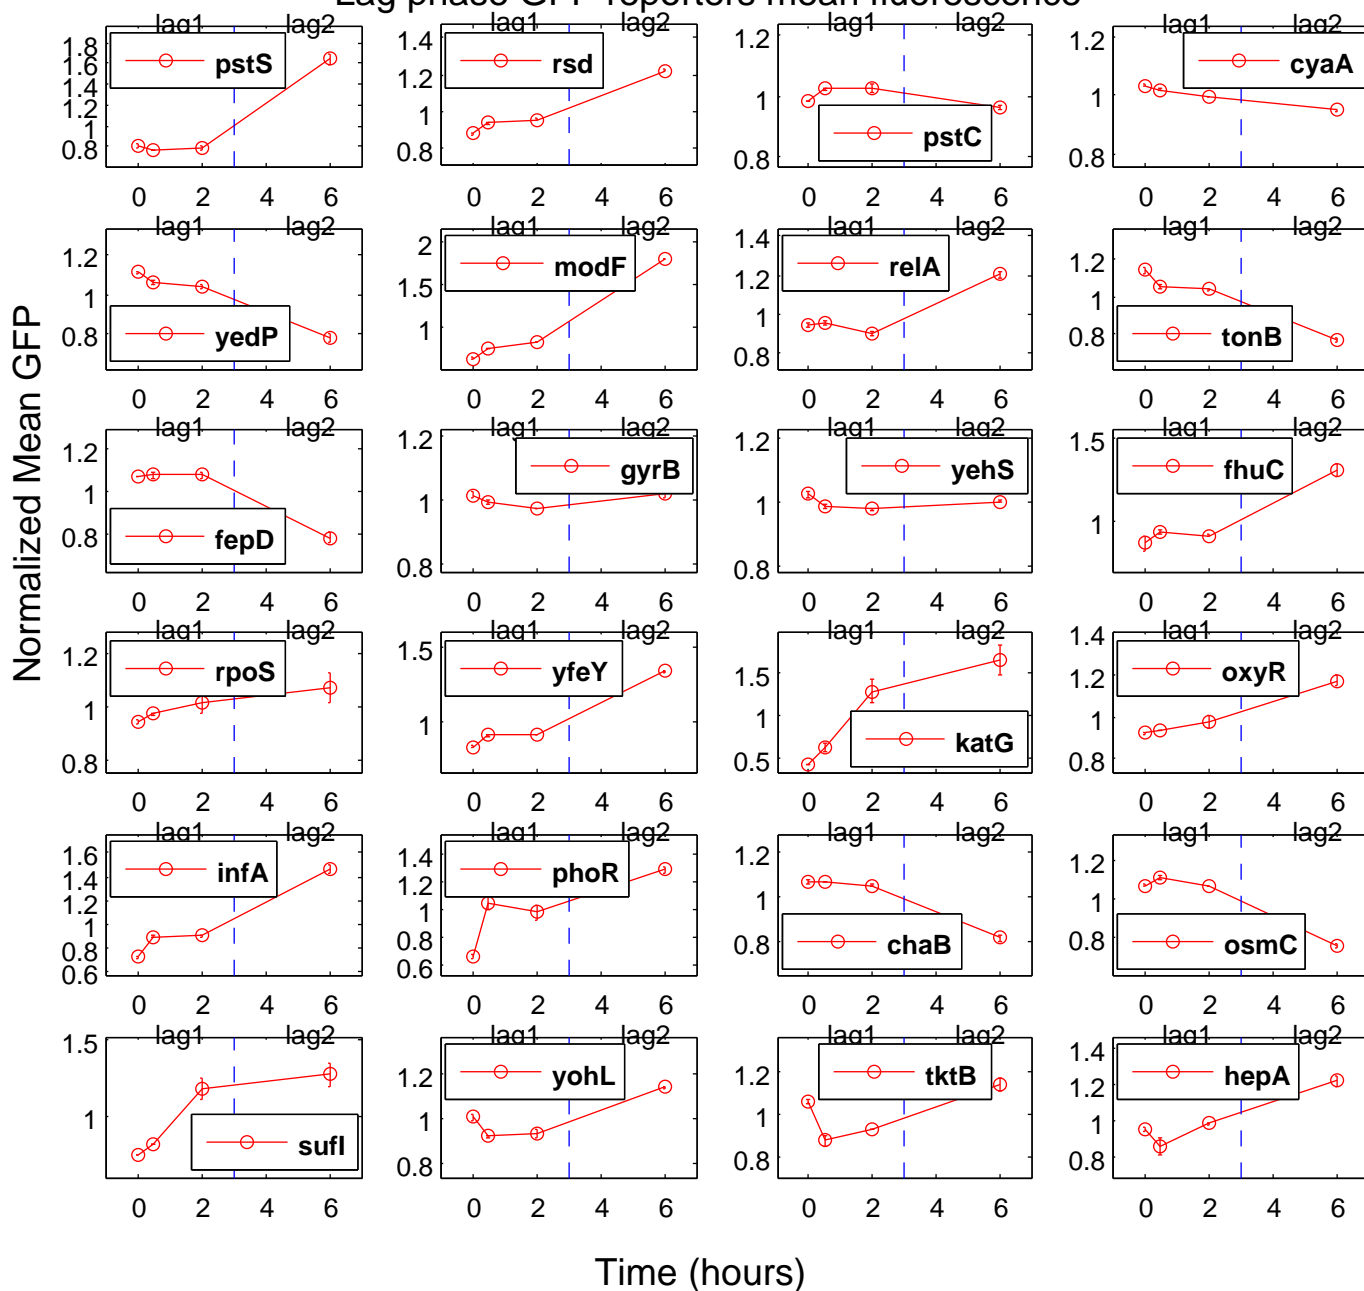

### Lag phase GFP reporters mean fluorescence

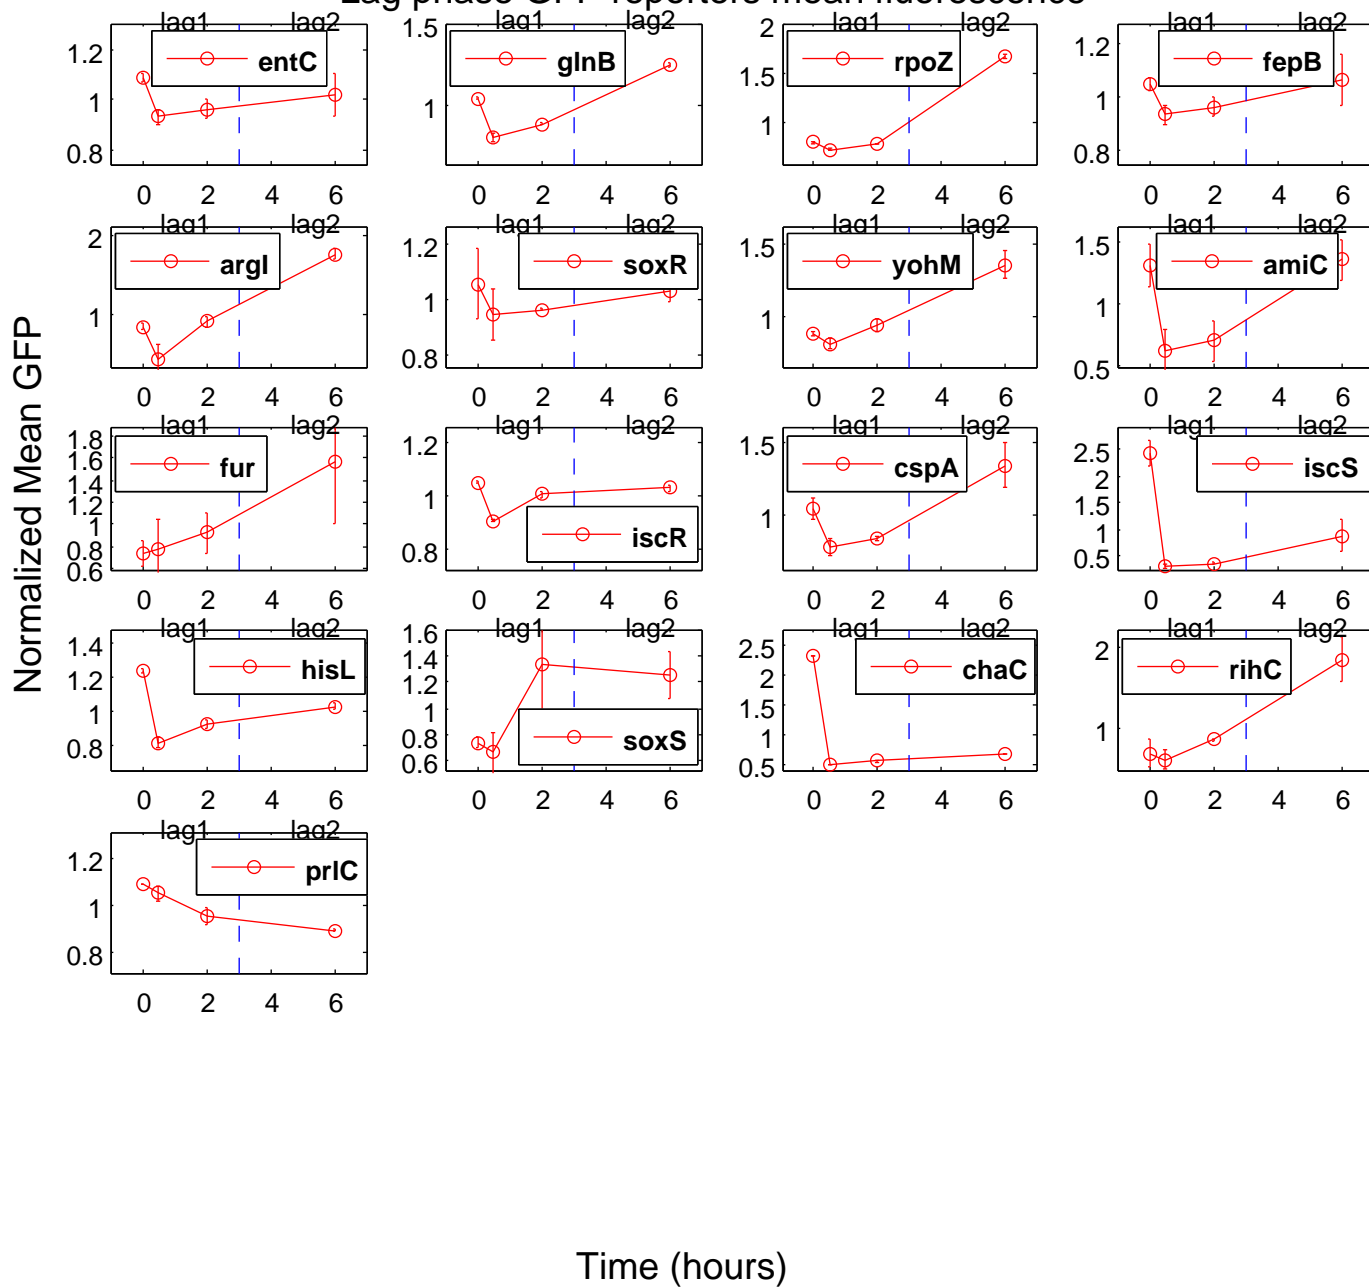

Supplement: 1752-0509-7-136-S3.pdf [file 1752-0509-7-136-S3.pdf]
